# Supplementary material for: Complete Loss of EPCAM Immunoexpression Identifies EPCAM Deletion Carriers in MSH2-Negative Colorectal Neoplasia
Source: PubMed Central journal article supplement (PMC7599495; doi:10.3390/cancers12102803), 2020-09-29
Supplement: cancers-12-02803-s001.pdf [file cancers-12-02803-s001.pdf]

## Supplementary Materials:

# Complete Loss of EPCAM Immunorexpression Identifies *EPCAM* Deletion Carriers in MSH2-Negative Colorectal Neoplasia

Table S1. Clinicopathological features and molecular alterations of all cases.

| Case        | Patient | Family | Gender | Age# (years) | Lesion | Histology | Location    | MSH2 Expression | EPCAM Expression | EPCAM Evaluation | Mutated Gene | Chromosomal Alteration | Significant |
|-------------|---------|--------|--------|--------------|--------|-----------|-------------|-----------------|------------------|------------------|--------------|------------------------|-------------|
| 1 $\alpha$  | 1       | 1      | M      | 31           | MA     | Mucinous  | Right colon | -               | +                |                  | <i>EPCAM</i> | Deletion of exons 8-9  | Pathogenic  |
| 2           | 1       |        |        | 34           | CP     | HP        | Right colon | +               | +                |                  |              |                        |             |
| 3 $\alpha$  | 2       | 1      | M      | 62           | MA     | Mucinous  | Right colon | -               | -                | I                | <i>EPCAM</i> | Deletion of exons 8-9  | Pathogenic  |
| 4           | 2       |        |        | 63           | CP     | HP        | Right colon | +               | +                |                  |              |                        |             |
| 5           | 2       |        |        | 63           | CP     | SSA       | Right colon | -               | +                |                  |              |                        |             |
| 6           | 2       |        |        | 64           | CP     | SSA       | Rectum      | -               | .*               | I                |              |                        |             |
| 7           | 2       |        |        | 65           | CP     | TSA       | Rectum      | -               | .*               | I                |              |                        |             |
| 8           | 2       |        |        | 66           | CP     | SSA       | Rectum      | -               | +                |                  |              |                        |             |
| 9           | 2       |        |        | 67           | CP     | SSA       | Rectum      | -               | .*               | I                |              |                        |             |
| 10 $\alpha$ | 3       | 1      | M      | 43           | MA     | Medullary | Right colon | -               | +                |                  | <i>EPCAM</i> | Deletion of exons 8-9  | Pathogenic  |
| 11 $\alpha$ | 3       |        |        | 43           | MA     | Mucinous  | Left colon  | -               | +                |                  |              |                        |             |
| 12          | 3       |        |        | 43           | CP     | SSA       | Left colon  | -               | -                | I                |              |                        |             |
| 13          | 3       |        |        | 43           | CP     | TVA       | Left colon  | -               | +                |                  |              |                        |             |
| 14 $\alpha$ | 4       | 1      | F      | 43           | MA     | ADC NOS   | Right colon | -               | -                | I                | <i>EPCAM</i> | Deletion of exons 8-9  | Pathogenic  |
| 15          | 4       |        |        | 43           | CP     | TSA       | Right colon | -               | +                |                  |              |                        |             |
| 16          | 4       |        |        | 45           | CP     | SSA       | Right colon | -               | +                |                  |              |                        |             |
| 17 $\alpha$ | 5       | 1      | M      | 45           | MA     | ADC NOS   | Right colon | -               | +                |                  | <i>EPCAM</i> | Deletion of exons 8-9  | Pathogenic  |
| 18 $\alpha$ | 5       |        |        | 45           | MA     | Mucinous  | Right colon | -               | +                |                  |              |                        |             |
| 19 $\alpha$ | 5       |        |        | 45           | MA     | Mucinous  | Left colon  | -               | -                | I                |              |                        |             |
| 20          | 5       |        |        | 45           | CP     | TA        | Right colon | -               | +                |                  |              |                        |             |
| 21          | 5       |        |        | 45           | CP     | TA        | Right colon | -               | +                |                  |              |                        |             |
| 22          | 5       |        |        | 54           | CP     | TA        | Rectum      | -               | .*               | I                |              |                        |             |
| 23 $\alpha$ | 6       | 1      | M      | 44           | MA     | Mucinous  | Right colon | -               | -                | I                | <i>EPCAM</i> | Deletion of exons 8-9  | Pathogenic  |
| 24 $\alpha$ | 6       |        |        | 44           | MA     | Mucinous  | Right colon | -               | -                | I                |              |                        |             |
| 25 $\alpha$ | 6       |        |        | 44           | MA     | Mucinous  | Left colon  | -               | +                |                  |              |                        |             |
| 26          | 6       |        |        | 45           | CP     | SSA       | Right colon | -               | +                |                  |              |                        |             |

|    |    |   |   |    |    |                        |                 |     |    |    |                   |                                                                    |            |
|----|----|---|---|----|----|------------------------|-----------------|-----|----|----|-------------------|--------------------------------------------------------------------|------------|
| 27 | 7  | 2 | F | 61 | MA | ADC NOS                | Left colon      | -   | +  |    | <i>EPCAM</i>      | Deletion of exons 8-9                                              | Pathogenic |
| 28 | 8  | 3 | F | 52 | MA | ADC NOS                | Duodenum        | -   | +  |    | <i>EPCAM</i>      | Deletion of exons 8-9                                              | Pathogenic |
| 29 | 9  | 4 | F | 43 | MA | ADC NOS                | Colon           | -   | +  |    | <i>EPCAM</i>      | Deletion of exons 8-9                                              | Pathogenic |
| 30 | 9  |   |   | 63 | MA | ADC NOS                | Colon           | -   | +  |    |                   |                                                                    |            |
| 31 | 10 | 4 | F | 31 | MA | ADC NOS                | Colon           | -   | -  | I  | <i>EPCAM</i>      | Deletion of exons 8-9                                              | Pathogenic |
| 32 | 10 |   |   | 31 | P  | HSIL                   | Cervix          | +   | -  | NI |                   |                                                                    |            |
| 33 | 10 |   |   | 31 | P  | HSIL                   | Cervix          | +   | -  | NI |                   |                                                                    |            |
| 34 | 11 | 4 | M | 33 | MA | ADC NOS                | Colon           | -   | -  | I  | <i>EPCAM</i>      | Deletion of exons 8-9                                              | Pathogenic |
| 35 | 11 |   |   | 33 | MA | ADC NOS                | Colon           | -   | -  | I  |                   |                                                                    |            |
| 36 | 11 |   |   | 33 | MA | ADC NOS                | Colon           | -   | -  | I  |                   |                                                                    |            |
| 37 | 12 | 5 | F | 56 | MA | ADC NFS                | Endometrium     | NA  | NA |    | <i>EPCAM</i>      | Deletion of exons 8-9                                              | Pathogenic |
| 38 | 12 |   |   | 75 | MA | Mucinous and medullary | Right colon     | -/C | -  | I  |                   |                                                                    |            |
| 39 | 12 |   |   | 80 | MA | ADC NFS                | Colon           | NA  | NA |    |                   |                                                                    |            |
| 40 | 13 | 5 | M | 54 | MA | ADC PD                 | Stomach         | -/C | +  |    | <i>EPCAM</i>      | Deletion of exons 8-9                                              | Pathogenic |
| 41 | 14 | 6 | F | 39 | MA | Clear cell C           | Ovary           | -   | +  |    | <i>EPCAM-MSH2</i> | Deletion of exons 8-9 of <i>EPCAM</i> and exons 1-2 of <i>MSH2</i> | Pathogenic |
| 42 | 14 |   |   | 40 | CP | TA                     | Right colon     | -   | -  | I  |                   |                                                                    |            |
| 43 | 14 |   |   | 42 | CP | TA                     | Right colon     | -   | +  |    |                   |                                                                    |            |
| 44 | 14 |   |   | 42 | CP | TA                     | Colon           | -   | -* | I  |                   |                                                                    |            |
| 45 | 15 | 6 | F | 22 | MA | Hodgkin Lymphoma       | Unknown         | NA  | NA |    | <i>EPCAM-MSH2</i> | Deletion of exons 8-9 of <i>EPCAM</i> and exons 1-2 of <i>MSH2</i> | Pathogenic |
| 46 | 15 |   |   | 38 | MA | Endometrioid C         | Endometrium     | -   | +  |    |                   |                                                                    |            |
| 47 | 16 |   | M | 40 | MA | Squamous Cell C        | Skin            | -   | -  | NI | <i>MSH2</i>       | c.689_691delinsTT; p.(Ala230Valfs*16)                              | Pathogenic |
| 48 | 16 |   |   | 41 | MA | Urothelial C           | Urinary bladder | -   | +  |    |                   |                                                                    |            |
| 49 | 16 |   |   | 42 | CP | SSA                    | Rectum          | -   | +  |    |                   |                                                                    |            |
| 50 | 16 |   |   | 47 | MA | Squamous Cell C        | Skin            | -   | -  | NI |                   |                                                                    |            |
| 51 | 16 |   |   | 48 | MA | Urothelial C           | Urinary bladder | -   | +  |    |                   |                                                                    |            |
| 52 | 17 |   | F | 57 | CP | TA                     | Right colon     | -   | +  |    | <i>MSH2</i>       | Duplication of exon 11; p.Gly587Alafs*3                            | Pathogenic |
| 53 | 17 |   |   | 57 | CP | SSA                    | Left colon      | +   | +  |    |                   |                                                                    |            |
| 54 | 18 |   | F | 55 | CP | TA                     | Right colon     | +   | +  |    | <i>MSH2</i>       | c.897T>A; p.(Tyr299*)                                              | Pathogenic |
| 55 | 18 |   |   | 55 | CP | TA                     | Left colon      | +   | +  |    |                   |                                                                    |            |
| 56 | 18 |   |   | 55 | CP | TA                     | Right colon     | +   | +  |    |                   |                                                                    |            |
| 57 | 18 |   |   | 55 | B  | Sebaceoma              | Skin            | -   | -  | NI |                   |                                                                    |            |
| 58 | 18 |   |   | 55 | B  | SA                     | Skin            | -   | -  | NI |                   |                                                                    |            |

|    |    |   |    |    |                |             |   |   |             |                                          |            |
|----|----|---|----|----|----------------|-------------|---|---|-------------|------------------------------------------|------------|
| 59 | 18 |   | 55 | B  | SA             | Skin        | - | - | NI          |                                          |            |
| 60 | 18 |   | 56 | CP | TA             | Right colon | + | + |             |                                          |            |
| 61 | 18 |   | 56 | CP | SSA            | Right colon | + | + |             |                                          |            |
| 62 | 18 |   | 58 | CP | TA             | Right colon | + | + |             |                                          |            |
| 63 | 18 |   | 58 | CP | SSA            | Right colon | + | + |             |                                          |            |
| 64 | 18 |   | 59 | CP | SSA            | Rectum      | + | + |             |                                          |            |
| 65 | 19 | F | 62 | CP | TA             | Left colon  | - | + | <i>MSH2</i> | c.689_691delinsTT;<br>p.(Ala230Valfs*16) | Pathogenic |
| 66 | 19 |   | 62 | CP | TA             | Left colon  | + | + |             |                                          |            |
| 67 | 19 |   | 63 | MA | Medullary      | Colon       | - | + |             |                                          |            |
| 68 | 19 |   | 63 | CP | SSA            | Appendix    | + | + |             |                                          |            |
| 69 | 19 |   | 64 | MA | Endometrioid C | Endometrium | - | + |             |                                          |            |
| 70 | 20 | M |    | MA | Neuroendocrine | Colon       | - | + | <i>MSH2</i> | c.689_691delinsTT;<br>p.(Ala230Valfs*16) | Pathogenic |
| 71 | 21 | M | 46 | MA | ADC NOS        | Colon       | - | + | <i>MSH2</i> | c.211G>C;<br>p.[?,Tyr66Serfs*10]         | Pathogenic |
| 72 | 22 | F | 81 | CP | TSA            | Right colon | - | + | <i>MSH2</i> | 691delinsTT;<br>p.(Ala230Valfs*16)       | Pathogenic |
| 73 | 22 |   | 81 | CP | TSA            | Rectum      | - | + |             |                                          |            |
| 74 | 22 |   | 82 | MA | ADC NOS        | Colon       | - | + |             |                                          |            |
| 75 | 22 |   | 82 | CP | TA             | Right colon | - | + |             |                                          |            |
| 76 | 22 |   | 82 | CP | SSA            | Right colon | + | + |             |                                          |            |
| 77 | 23 | F | 44 | MA | Medullary      | Colon       | - | + | <i>MSH2</i> | c.518T>G; p.(Leu173Arg)                  | Pathogenic |
| 78 | 23 |   | 45 | CP | TA             | Rectum      | - | + |             |                                          |            |
| 79 | 24 | M | 31 | MA | Mucinous       | Right colon | - | + | <i>MSH2</i> | c.2415_2421dup;<br>p.(Glu808Hisfs*3)     | Pathogenic |
| 80 | 25 | M | 47 | MA | ADC NOS        | Left colon  | - | + | <i>MSH2</i> | c.1226_1227del;<br>p.(Gln409Argfs*7)     | Pathogenic |
| 81 | 26 | M | 61 | CP | SSA            | Colon       | - | + | <i>MSH2</i> | c.536dup; p.(Asp180*)                    | Pathogenic |
| 82 | 26 |   | 61 | MA | ADC NOS        | Right colon | - | + |             |                                          |            |
| 83 | 26 |   | 62 | MA | ADC NOS        | Right colon | - | + |             |                                          |            |
| 84 | 26 |   | 67 | CP | SSA            | Colon       | + | + |             |                                          |            |
| 85 | 26 |   | 71 | MA | ADC NOS        | Colon       | - | + |             |                                          |            |
| 86 | 26 |   | 75 | CP | TA             | Right colon | - | + |             |                                          |            |
| 87 | 26 |   | 77 | CP | TA             | Right colon | - | + |             |                                          |            |
| 88 | 26 |   | 81 | MA | ADC NOS        | Left colon  | - | + |             |                                          |            |
| 89 | 26 |   | 81 | CP | TA             | Rectum      | - | + | <i>MSH2</i> |                                          |            |
| 90 | 27 | F | 57 | MA | ADC NOS        | Rectum      | - | + | <i>MSH2</i> | c. 223dup;<br>p.(Leu75Profs*7)           | Pathogenic |

|     |    |   |    |    |                |                 |   |   |             |                                        |            |
|-----|----|---|----|----|----------------|-----------------|---|---|-------------|----------------------------------------|------------|
| 91  | 28 | M | 44 | MA | ADC NOS        | Rectum          | - | + | <i>MSH2</i> | c.536dup; p.(Asp180*)                  | Pathogenic |
| 92  | 29 | M | 42 | MA | Medullary C    | Rectum          | - | + | <i>MSH2</i> | c. 223dup;<br>p.(Leu75Profs*7)         | Pathogenic |
| 93  | 30 | F | 49 | MA | Endometrioid C | Endometrium     | - | + | <i>MSH2</i> | c.732delG;<br>p.(Leu244Phefs*2)        | Pathogenic |
| 94  | 30 |   | 49 | P  | CH             | Endometrium     | - | + |             |                                        |            |
| 95  | 31 | F | 45 | MA | Mucinous       | Right colon     | - | + | <i>MSH2</i> | c.731_734del;<br>p.(Leu244*)           | Pathogenic |
| 96  | 32 | F | 36 | MA | ADC NOS        | Right colon     | - | + | <i>MSH2</i> | c.2593dup;<br>p.(Ile865Asnfs*17)       | Pathogenic |
| 97  | 33 | F | 46 | MA | Serous C       | Endometrium     | - | + | <i>MSH2</i> | c.1216C>T; p.(Arg406*)                 | Pathogenic |
| 98  | 34 | F | 48 | MA | Endometrioid C | Endometrium     | - | + | <i>MSH2</i> | c.942+3A>T;<br>p.Val265_Gln314del      | Pathogenic |
| 99  | 34 |   | 48 | P  | SH             | Endometrium     | - | + |             |                                        |            |
| 100 | 35 | M | 65 | MA | Urothelial C   | Urinary bladder | + | + | <i>MSH2</i> | NFS                                    | Pathogenic |
| 101 | 36 | F | 43 | CP | TA             | Right colon     | - | + | <i>MSH2</i> | c.536_537insC;<br>p.Asp180X            | Pathogenic |
| 102 | 36 |   | 43 | CP | TA             | Right colon     | - | + |             |                                        |            |
| 103 | 36 |   | 43 | CP | HP             | Right colon     | + | + |             |                                        |            |
| 104 | 36 |   | 43 | MA | ADC NOS        | Colon           | - | + |             |                                        |            |
| 105 | 36 |   | 44 | P  | SH             | Endometrium     | - | + |             |                                        |            |
| 106 | 36 |   | 46 | CP | TA             | Right colon     | + | + |             |                                        |            |
| 107 | 36 |   | 48 | CP | SSA            | Rectum          | + | + |             |                                        |            |
| 108 | 37 | F | 37 | MA | ADC NOS        | Endometrium     | - | + | <i>MSH2</i> | c.536_537insC;<br>p.Asp180X            | Pathogenic |
| 109 | 38 | F | 39 | CP | TA             | Colon           | - | + | <i>MSH2</i> | Deletion of exons 9-10                 | Pathogenic |
| 110 | 38 |   | 43 | CP | HP             | Left colon      | + | + |             |                                        |            |
| 111 | 39 | F | 24 | CP | TA             | Left colon      | - | + | <i>MSH2</i> | c.732delG;<br>p.(Leu244Phefs*2)        | Pathogenic |
| 112 | 39 |   | 24 | MA | ADC NOS        | Left colon      | - | + |             |                                        |            |
| 113 | 39 |   | 24 | CP | SSA            | Left colon      | - | + |             |                                        |            |
| 114 | 40 | F | 63 | CP | TA             | Left colon      | - | + | <i>MSH2</i> | c.2222_2223delAA;<br>p.(Lys741Argfs*8) | Pathogenic |
| 115 | 40 |   | 63 | MA | Mucinous       | Duodenum        | - | + |             |                                        |            |
| 116 | 40 |   | 64 | MA | ADC NOS        | Colon           | - | + |             |                                        |            |
| 117 | 41 | M | 53 | MA | ADC NOS        | Rectum          | - | + | <i>MSH2</i> | Deletion of exons 9-10                 | Pathogenic |
| 118 | 41 |   | 53 | CP | SSA            | Rectum          | - | + |             |                                        |            |
| 119 | 41 |   | 53 | CP | SSA            | Left colon      | - | + |             |                                        |            |
| 120 | 42 | M | 32 | MA | ADC NOS        | Right colon     | - | + | <i>MSH2</i> | c.1662-2A>G; p.?                       | Pathogenic |

|     |    |   |    |    |                         |             |   |   |    |             |                                     |            |
|-----|----|---|----|----|-------------------------|-------------|---|---|----|-------------|-------------------------------------|------------|
| 121 | 43 | F | 36 | MA | Endometrioid C          | Endometrium | + | + |    | <i>MSH2</i> | Deletion of exon 8; p.Lys427Glyfs*4 | Pathogenic |
| 122 | 44 | F | 56 | MA | Endometrioid C          | Endometrium | - | + |    | <i>MSH2</i> | c.2164_2192del; p.(Val722Asnfs*18)  | Pathogenic |
| 123 | 44 |   | 59 | CP | SSA                     | Right colon | + | + |    |             |                                     |            |
| 124 | 45 | M | 36 | MA | Mucinous                | Right colon | - | + |    | <i>MSH2</i> | c.2074G>C; p.(Gly692Arg)            | Pathogenic |
| 125 | 46 | F | 53 | MA | Ductal C                | Breast      | + | - | NI | <i>MSH2</i> | c.2635-3C>T;2635-5T>C]; p.?         | Pathogenic |
| 126 | 46 |   | 53 | P  | Ductal <i>in situ</i> C | Breast      | + | - | NI |             |                                     |            |
| 127 | 47 | F | 39 | MA | Clear cell C            | Unknown     | - | + |    | <i>MSH2</i> | c.[2635-3C>T;2635-5T>C]; p.?        | Pathogenic |
| 128 | 48 | F | 48 | P  | CH                      | Endometrium | - | + |    | <i>MSH2</i> | c.1705_1706delGA; p.(Glu569Ilefs*2) | Pathogenic |
| 129 | 48 |   | 48 | MA | Endometrioid C          | Endometrium | - | + |    |             |                                     |            |
| 130 | 49 | F | 42 | MA | Endometrioid C          | Endometrium | - | + |    | <i>MSH2</i> | c.367-6_370dup; p.(Ser124Tyrfs*12)  | Pathogenic |
| 131 | 49 |   | 42 | P  | CH                      | Endometrium | - | + |    |             |                                     |            |
| 132 | 50 | M | 58 | MA | Squamous Cell C         | Skin        | - | - | NI | <i>MSH2</i> | c.1705_1706delGA; p.(Glu569Ilefs*2) | Pathogenic |
| 133 | 51 | F | 50 | MA | Endometrioid C          | Endometrium | - | + |    | <i>MSH2</i> | c.1705_1706delGA; p.(Glu569Ilefs*2) | Pathogenic |
| 134 | 51 |   | 50 | MA | Clear cell C            | Endometrium | - | + |    |             |                                     |            |
| 135 | 52 | F | 45 | MA | Medullary               | Colon       | - | + |    | <i>MSH2</i> | c.536dup; p.(Asp180*)               | Pathogenic |
| 136 | 52 |   | 51 | MA | Squamous Cell C         | Skin        | - | - | NI |             |                                     |            |
| 137 | 53 | F | 37 | MA | Medullary               | Right colon | - | + |    | <i>MSH2</i> | c.970C>T; p.(Gln324*)               | Pathogenic |
| 138 | 54 | F | 42 | MA | Undifferentiated C      | Ovary       | - | + |    | <i>MSH2</i> | c.1276G>A; p.Ile411_Gly426del16     | Pathogenic |
| 139 | 54 |   | 42 | MA | ADC NOS                 | Right colon | - | + |    |             |                                     |            |
| 140 | 55 | M | 48 | MA | ADC NOS                 | Right colon | - | + |    | <i>MSH2</i> | Deletion of exons 9-10              | Pathogenic |
| 141 | 55 |   | 48 | CP | TA                      | Right colon | - | + |    |             |                                     |            |
| 142 | 55 |   | 48 | CP | TA                      | Right colon | - | + |    |             |                                     |            |
| 143 | 55 |   | 48 | CP | TA                      | Right colon | - | + |    |             |                                     |            |
| 144 | 55 |   | 48 | MA | ADC NOS                 | Right colon | - | + |    |             |                                     |            |
| 145 | 55 |   | 57 | MA | ADC NOS                 | Prostate    | - | + |    |             |                                     |            |
| 146 | 56 | M | 41 | MA | Squamous Cell C         | Skin        | - | - | NI | <i>MSH2</i> | Deletion of exons 9-10              | Pathogenic |
| 147 | 57 | M | 56 | MA | Squamous Cell C         | Lip         | - | - | NI | <i>MSH2</i> | c.536dup; p.(Asp180*)               | Pathogenic |
| 148 | 58 | F | 28 | MA | ADC NOS                 | Endometrium | - | + |    | <i>MSH2</i> | c.1276G>A; p.Ile411_Gly426del16     | Pathogenic |

|     |    |   |    |    |                    |                 |   |   |    |             |                                          |            |
|-----|----|---|----|----|--------------------|-----------------|---|---|----|-------------|------------------------------------------|------------|
| 149 | 59 | M | 42 | MA | Mucinous           | Right colon     | - | + |    | <i>MSH2</i> | c.942+3A>T;<br>p.Val265_Gln314del        | Pathogenic |
| 150 | 59 |   | 42 | MA | Mucinous           | Right colon     | - | + |    |             |                                          |            |
| 151 | 60 | F | 50 | MA | Endometrioid C     | Endometrium     | - | + |    | <i>MSH2</i> | Deletion of exon 8;<br>p.Lys427Glyfs*4   | Pathogenic |
| 152 | 60 |   | 50 | P  | CH                 | Endometrium     | - | + |    |             |                                          |            |
| 153 | 60 |   | 54 | MA | ADC NOS            | Right colon     | - | + |    |             |                                          |            |
| 154 | 61 | F | 53 | MA | Undifferentiated C | Endometrium     | + | + |    | <i>MSH2</i> | c.1980_1981delTA;<br>p.(Asp660Gluufs*15) | Pathogenic |
| 155 | 62 | F | 33 | MA | Endometrioid C     | Endometrium     | - | + |    | <i>MSH2</i> | c.1035G>A; c.1035G>A                     | Pathogenic |
| 156 | 63 | F | 61 | MA | Urothelial C       | Renal pelvis    | - | + |    | <i>MSH2</i> | c.1345_1348delAAG;p(L<br>ys449Phefs*4)   | Pathogenic |
| 157 | 63 |   | 61 | MA | ADC NOS            | Pancreas        | - | + |    |             |                                          |            |
| 158 | 64 | M | 57 | MA | ADC NOS            | Colon           | - | + |    | <i>MSH2</i> | c.[2635-3C>T;2635-5T><br>C]; p.?         | Pathogenic |
| 159 | 64 |   | 57 | CP | TA                 | Right colon     | + | + |    |             |                                          |            |
| 160 | 64 |   | 57 | CP | TA                 | Right colon     | - | + |    |             |                                          |            |
| 161 | 64 |   | 57 | CP | TA                 | Right colon     | + | + |    |             |                                          |            |
| 162 | 64 |   | 65 | MA | Undifferentiated C | Adrenal gland   | - | - | NI |             |                                          |            |
| 163 | 65 | M | 50 | MA | Mucinous           | Colon           | - | + |    | <i>MSH2</i> | c.1076+1G>A;<br>p.Gly315Ilefs*29         | Pathogenic |
| 164 | 65 |   | 50 | MA | Urothelial C       | Urinary bladder | + | + |    |             |                                          |            |
| 165 | 65 |   | 50 | MA | Urothelial C       | Ureter          | - | + |    |             |                                          |            |
| 166 | 65 |   | 52 | B  | Sebaceoma          | Skin            | - | - | NI |             |                                          |            |
| 167 | 65 |   | 52 | MA | Basal cell C       | Skin            | - | - | NI |             |                                          |            |
| 168 | 65 |   | 53 | CP | TA                 | Rectum          | + | + |    |             |                                          |            |
| 169 | 65 |   | 53 | B  | Sebaceoma          | Skin            | - | - | NI |             |                                          |            |
| 170 | 65 |   | 54 | MA | Urothelial C       | Urinary bladder | - | + |    |             |                                          |            |
| 171 | 65 |   | 54 | B  | SA                 | Skin            | - | - | NI |             |                                          |            |
| 172 | 65 |   | 54 | B  | SA                 | Skin            | - | - | NI |             |                                          |            |
| 173 | 66 | M | 40 | MA | ADC NOS            | Rectum          | - | + |    | <i>MSH2</i> | c.528_529delTG;<br>p.(Cys176*)           | Pathogenic |
| 174 | 67 | M | 49 | MA | ADC NOS            | Rectum          | - | + |    | <i>MSH2</i> | c.[2635-3C>T;2635-5T><br>C]; p.?         | Pathogenic |
| 175 | 67 |   | 53 | B  | SA                 | Skin            | - | - | NI |             |                                          |            |
| 176 | 68 | F | 35 | MA | ADC NOS            | Colon           | - | + |    | <i>MSH2</i> | c.2069A>G;<br>p.(Gln690Arg)              | Pathogenic |
| 177 | 68 |   | 43 | CP | SSA                | Colon           | - | + |    |             |                                          |            |
| 178 | 68 |   | 45 | CP | SSA                | Colon           | - | + |    |             |                                          |            |

|     |    |   |    |    |                |             |   |   |  |             |                   |     |
|-----|----|---|----|----|----------------|-------------|---|---|--|-------------|-------------------|-----|
| 179 | 68 |   | 52 | CP | TVA            | Right colon | - | + |  |             |                   |     |
| 180 | 68 |   | 53 | MA | ADC NOS        | Colon       | - | + |  |             |                   |     |
| 181 | 68 |   | 54 | CP | TA             | Colon       | - | + |  |             |                   |     |
| 182 | 68 |   | 54 | CP | SSA            | Colon       | - | + |  |             |                   |     |
| 183 | 68 |   | 58 | MA | ADC NOS        | Colon       | - | + |  |             |                   |     |
| 184 | 68 |   | 61 | CP | TA             | Colon       | - | + |  |             |                   |     |
| 185 | 68 |   | 62 | MA | Medullary      | Right colon | - | + |  |             |                   |     |
| 186 | 69 | F | 54 | CP | SSA            | Right colon | + | + |  | <i>MSH2</i> | NFS               | VUS |
| 187 | 69 |   | 55 | CP | SSA            | Left colon  | + | + |  |             |                   |     |
| 188 | 69 |   | 57 | CP | TA             | Right colon | - | + |  |             |                   |     |
| 189 | 70 | F | 47 | MA | Endometrioid C | Endometrium | - | + |  | Unknown     | No mutation found |     |
| 190 | 71 | F | 33 | MA | Mucinous       | Left colon  | - | + |  | Unknown     | No mutation found |     |

Abbreviations:  $\alpha$ , cases included in previous series (refs.12,13); #, age at diagnosis; F, female; M, male; B, benign; P, precursor; CP, colorectal polyp; MA, malignant; ADC NOS, adenocarcinoma not otherwise specified; ADC PD, adenocarcinoma poorly differentiated; C, carcinoma; CH, complex hyperplasia; SH, simplex hyperplasia; HP, hyperplastic polyp; TA, tubular adenoma; SSL: sessile serrated lesion; TSA, traditional serrated adenoma; +, positive; -, negative; -\*, focal negative; C, cytoplasmic; I, informative; NI, noninformative; NFS, not further specified; VUS, variant of unknown significance; NA, not available.

**Table S2.** Clinicopathological features and molecular alterations of colorectal polyps.

| Case | Patient | Family   | Gender | Age | Histology | Location    | Size (mm) | Dysplasia | MSH2 Expression | EPCAM Expression | Mutated Gene      |
|------|---------|----------|--------|-----|-----------|-------------|-----------|-----------|-----------------|------------------|-------------------|
| 1    | 1       | Family 1 | M      | 34  | HP        | Right colon | 1         | WD        | +               | +                | <i>EPCAM</i>      |
| 2    | 2       | Family 1 | M      | 63  | HP        | Right colon | 5         | WD        | +               | +                | <i>EPCAM</i>      |
| 3    | 2       | Family 1 |        | 63  | SSL       | Right colon | 4         | HGD       | -               | +                |                   |
| 4    | 2       | Family 1 |        | 64  | SSL       | Rectum      | 5         | HGD       | -               | -*               |                   |
| 5    | 2       | Family 1 |        | 65  | TSA       | Rectum      | 8         | HGD       | -               | -*               |                   |
| 6    | 2       | Family 1 |        | 66  | SSL       | Rectum      | 14        | HGD       | -               | +                |                   |
| 7    | 2       | Family 1 |        | 67  | SSL       | Rectum      | 10        | HGD       | -               | -*               |                   |
| 8    | 3       | Family 1 | M      | 43  | SSL       | Left colon  | 7         | HGD       | -               | -                | <i>EPCAM</i>      |
| 9    | 3       | Family 1 |        | 43  | TVA       | Left colon  | 6         | HGD       | -               | +                |                   |
| 10   | 4       | Family 1 | F      | 43  | TSA       | Right colon | 8         | HGD       | -               | +                | <i>EPCAM</i>      |
| 11   | 4       | Family 1 |        | 45  | SSL       | Right colon | 10        | HGD       | -               | +                |                   |
| 12   | 5       | Family 1 | M      | 45  | TA        | Right colon | 4         | HGD       | -               | +                | <i>EPCAM</i>      |
| 13   | 5       | Family 1 |        | 45  | TA        | Right colon | 4         | HGD       | -               | +                |                   |
| 14   | 5       | Family 1 |        | 54  | TA        | Rectum      | 5         | HGD       | -               | -*               |                   |
| 15   | 6       | Family 1 | M      | 45  | SSL       | Right colon | 2         | LGD       | -               | +                | <i>EPCAM</i>      |
| 16   | 14      | Family 6 | F      | 40  | TA        | Right colon | 15        | HGD       | -               | -                | <i>EPCAM-MSH2</i> |
| 17   | 14      | Family 6 |        | 42  | TA        | Right colon | 12        | LGD       | -               | +                |                   |

|    |    |          |    |    |       |             |     |     |    |   |             |
|----|----|----------|----|----|-------|-------------|-----|-----|----|---|-------------|
| 18 | 14 | Family 6 | 42 | TA | Colon | 7           | LGD | -   | .* |   |             |
| 19 | 16 |          | M  | 42 | SSL   | Rectum      | 6   | WD  | -  | + | <i>MSH2</i> |
| 20 | 17 |          | F  | 57 | TA    | Right colon | 11  | LGD | -  | + | <i>MSH2</i> |
| 21 | 17 |          |    | 57 | SSL   | Left colon  | 10  | LGD | +  | + |             |
| 22 | 18 |          | F  | 55 | TA    | Right colon | 1   | HGD | +  | + | <i>MSH2</i> |
| 23 | 18 |          |    | 55 | TA    | Left colon  | 5   | LGD | +  | + |             |
| 24 | 18 |          |    | 55 | TA    | Right colon | 10  | HGD | +  | + |             |
| 25 | 18 |          |    | 56 | TA    | Right colon | 3   | HGD | +  | + |             |
| 26 | 18 |          |    | 56 | SSL   | Right colon | 4   | HGD | +  | + |             |
| 27 | 18 |          |    | 58 | TA    | Right colon | 2   | LGD | +  | + |             |
| 28 | 18 |          |    | 58 | SSL   | Right colon | 10  | HGD | +  | + |             |
| 29 | 18 |          |    | 59 | SSL   | Rectum      | 3   | WD  | +  | + |             |
| 30 | 19 |          | F  | 62 | TA    | Left colon  | 1   | LGD | -  | + | <i>MSH2</i> |
| 31 | 19 |          |    | 62 | TA    | Left colon  | 2   | LGD | +  | + |             |
| 32 | 19 |          |    | 63 | SSL   | Appendix    | 2   | WD  | +  | + |             |
| 33 | 22 |          | F  | 81 | TSA   | Right colon | 4   | HGD | -  | + | <i>MSH2</i> |
| 34 | 22 |          |    |    | TSA   | Rectum      | 12  | HGD | -  | + |             |
| 35 | 22 |          |    |    | TA    | Right colon | 5   | HGD | -  | + |             |
| 36 | 22 |          |    |    | SSL   | Right colon | 14  | HGD | +  | + |             |
| 37 | 23 |          | F  | 45 | TA    | Rectum      | 8   | HGD | -  | + | <i>MSH2</i> |
| 38 | 26 |          | M  | 61 | SSL   | Colon       | 6   | HGD | -  | + | <i>MSH2</i> |
| 39 | 26 |          |    | 67 | SSL   | Colon       | 8   | HGD | +  | + |             |
| 40 | 26 |          |    | 75 | TA    | Right colon | 7   | LGD | -  | + |             |
| 41 | 26 |          |    | 77 | TA    | Right colon | 4   | HGD | -  | + |             |
| 42 | 26 |          |    | 81 | TA    | Rectum      | 10  | HGD | -  | + |             |
| 43 | 36 |          | F  | 43 | TA    | Right colon | 4   | HGD | -  | + | <i>MSH2</i> |
| 44 | 36 |          |    | 43 | TA    | Right colon | 8   | HGD | -  | + |             |
| 45 | 36 |          |    | 43 | HP    | Right colon | 8   | WD  | +  | + |             |
| 46 | 36 |          |    | 46 | TA    | Right colon | 10  | LGD | +  | + |             |
| 47 | 36 |          |    | 48 | SSL   | Rectum      | 3   | WD  | +  | + |             |
| 48 | 38 |          | F  | 39 | TA    | Colon       | 9   | LGD | -  | + | <i>MSH2</i> |
| 49 | 38 |          |    | 43 | HP    | Left colon  | 3   | WD  | +  | + |             |
| 50 | 39 |          | F  | 24 | TA    | Left colon  | 22  | LGD | -  | + | <i>MSH2</i> |
| 51 | 40 |          | F  | 63 | TA    | Left colon  | 10  | HGD | -  | + | <i>MSH2</i> |
| 52 | 41 |          | M  | 53 | SSL   | Rectum      | 5   | HGD | -  | + | <i>MSH2</i> |
| 53 | 44 |          | F  | 59 | SSL   | Right colon | 22  | LGD | +  | + | <i>MSH2</i> |
| 54 | 39 |          | F  | 24 | SSL   | Left colon  | 20  | LGD | -  | + | <i>MSH2</i> |
| 55 | 41 |          | M  | 53 | SSL   | Left colon  | 20  | HGD | -  | + | <i>MSH2</i> |
| 56 | 55 |          | M  | 48 | TA    | Right colon | 3   | LGD | -  | + | <i>MSH2</i> |



|    |    |   |    |     |             |    |     |   |   |             |
|----|----|---|----|-----|-------------|----|-----|---|---|-------------|
| 57 | 55 |   | 48 | TA  | Right colon | 15 | LGD | - | + |             |
| 58 | 55 |   | 48 | TA  | Right colon | 10 | LGD | - | + |             |
| 59 | 64 | M | 57 | TA  | Right colon | 1  | LGD | + | + | <i>MSH2</i> |
| 60 | 64 |   | 57 | TA  | Right colon | 9  | LGD | - | + |             |
| 61 | 64 |   | 57 | TA  | Right colon | 9  | LGD | + | + |             |
| 62 | 65 | M | 53 | TA  | Rectum      | 2  | LGD | + | + | <i>MSH2</i> |
| 63 | 68 | F | 43 | SSL | Colon       | 8  | LGD | - | + | <i>MSH2</i> |
| 64 | 68 |   | 45 | SSL | Colon       | 12 | LGD | - | + |             |
| 65 | 68 |   | 52 | TVA | Right colon | 15 | HGD | - | + |             |
| 66 | 68 |   | 54 | TA  | Colon       | 8  | LGD | - | + |             |
| 67 | 68 |   | 54 | SSL | Colon       | 7  | LGD | - | + |             |
| 68 | 68 |   | 61 | TA  | Colon       | 5  | LGD | - | + |             |
| 69 | 69 | F | 54 | SSL | Right colon | 2  | WD  | + | + | <i>MSH2</i> |
| 70 | 69 |   | 55 | SSL | Left colon  | 3  | WD  | + | + |             |
| 71 | 69 |   | 57 | TA  | Right colon | 6  | LGD | - | + |             |

Abbreviations: F, female; M, male; TA, tubular adenoma; TVA, tubulovillous adenoma; HP, hyperplastic polyp; SSL, sessile serrated lesion; TSA, traditional serrated adenoma; WD, without dysplasia; LGD, low grade dysplasia; HGD, high grade dysplasia; +, positive; -, negative; -\*, focal negative.
